# Supplementary material
Source: PubMed Central journal article supplement (PMC4827620)

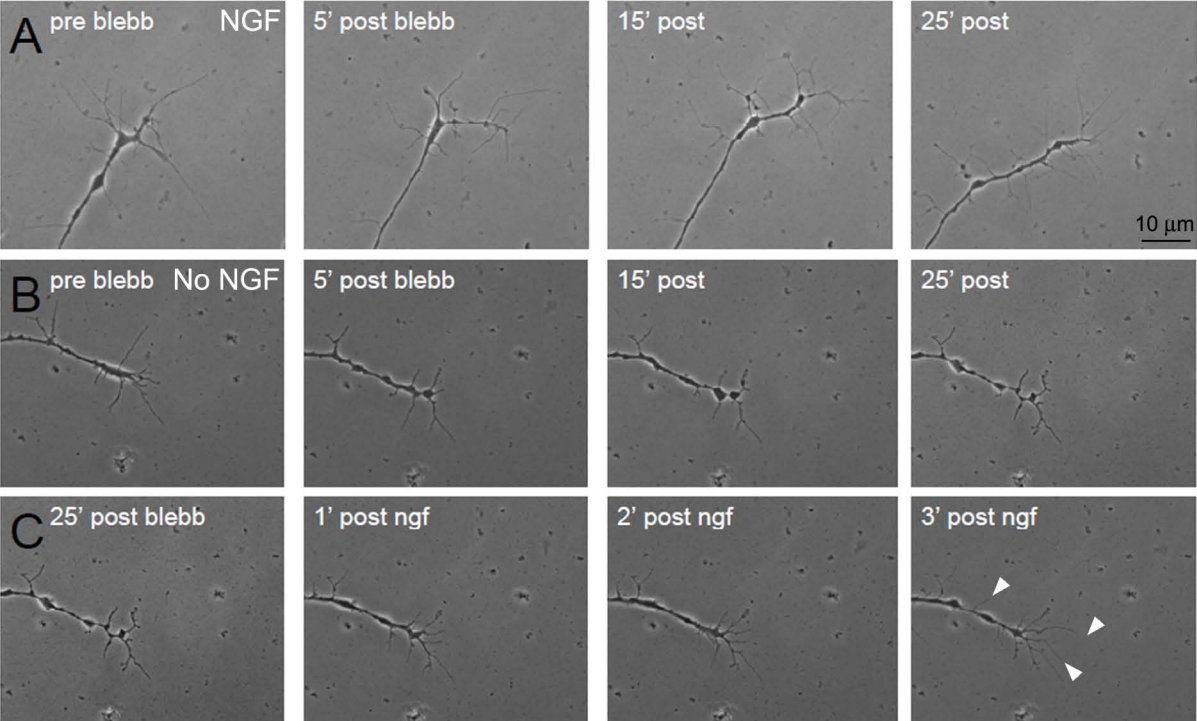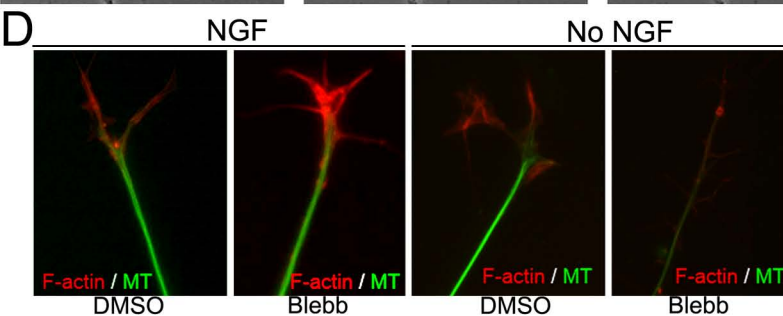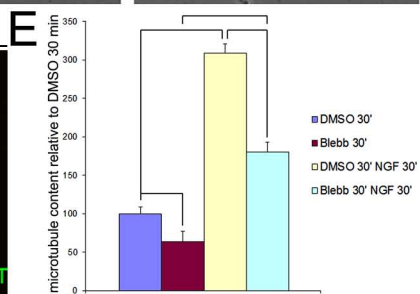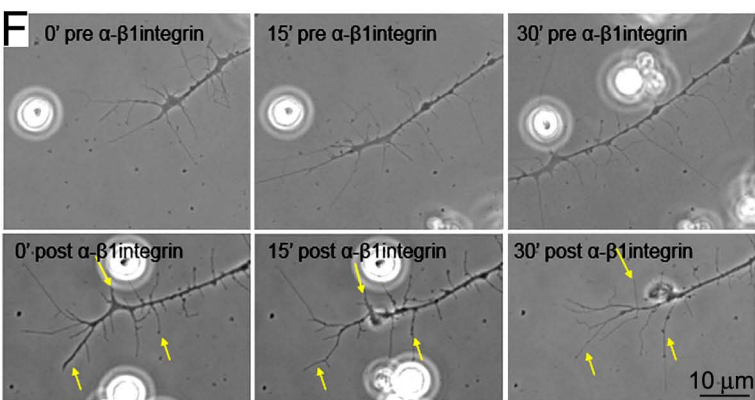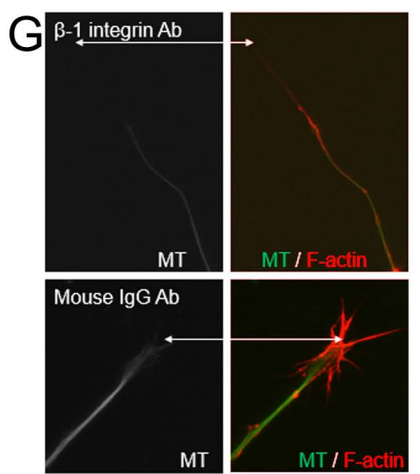

**A**

Growth cone

Tubulin  
Acetylated  
tubulin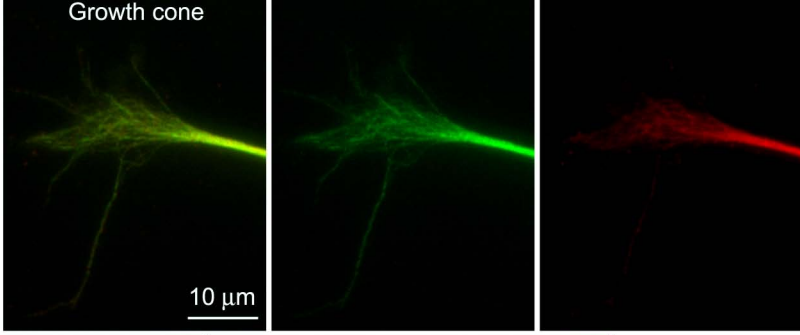**B**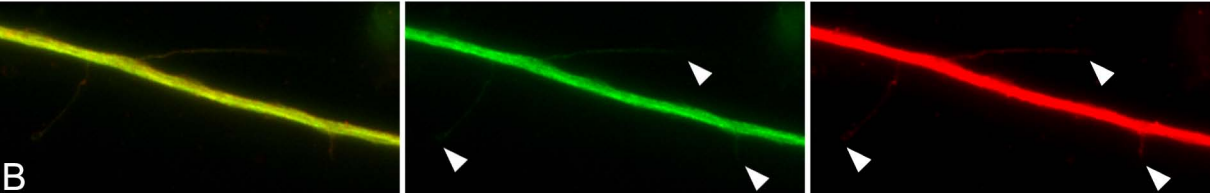**C**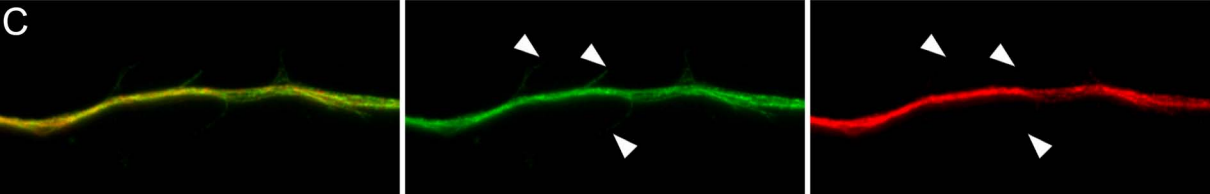**D**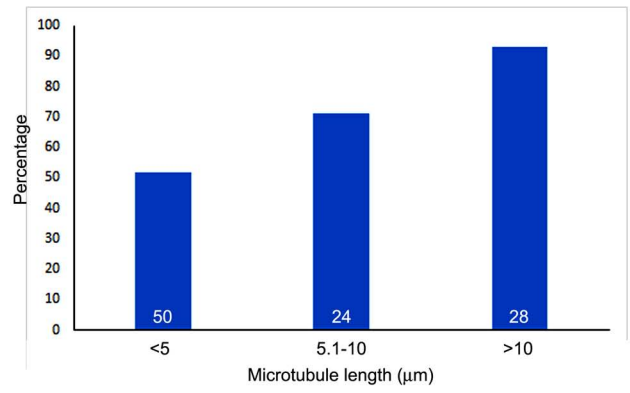

Supplement: NIHMS679646-supplement-Supp_FigureS1-S2.pdf [file NIHMS679646-supplement-Supp_FigureS1-S2.pdf]
